# Supplementary material
Source: PubMed Central journal article supplement (PMC6214470)
Supplement: NIHMS992931-supplement-1.pdf [file NIHMS992931-supplement-1.pdf]

**Improving RNA Modification Mapping Sequence Coverage by LC-MS  
through a Nonspecific RNase U2-E49A Mutant**

Beulah Solivio, Ningxi Yu, Balasubrahmanyam Addepalli and Patrick A. Limbach\*

Rieveschl Laboratories for Mass Spectrometry, Department of Chemistry, University  
of Cincinnati, PO Box 210172, Cincinnati, Ohio 45221-0172, United States

\*To whom correspondence should be addressed.

Phone (513) 556-1871

Fax (513) 556-9239

Email [Pat.Limbach@uc.edu](mailto:Pat.Limbach@uc.edu)

**SUPPLEMENTAL INFORMATION**

Supplemental Figures S1-S22

Supplemental Table S1

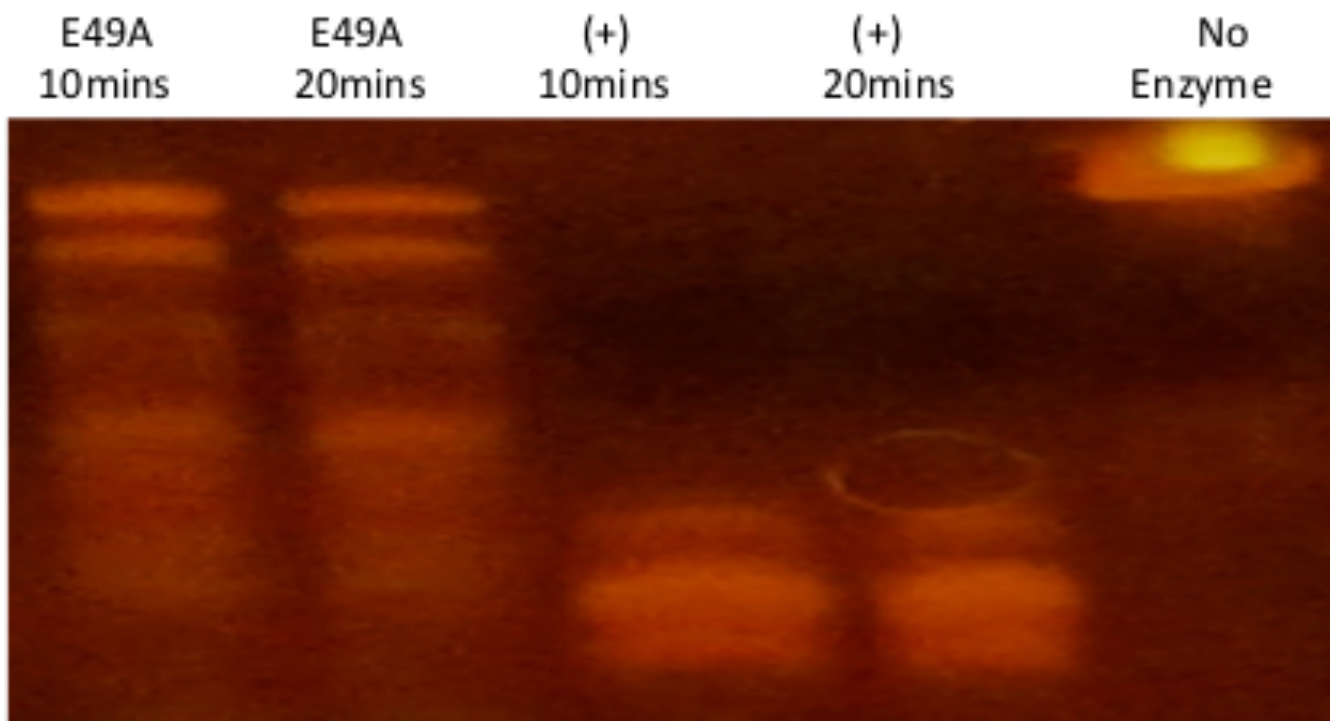

**Supplemental Figure S1.** Activity of E49A RNase U2 mutant compared to codon-optimized RNase U2. 1 ng of enzyme was incubated with 3  $\mu\text{g}$  *Saccharomyces cerevisiae* tRNA<sup>Phe</sup> in 50 mM ammonium acetate, pH 4.5, at room temperature for 10 and 20 min. Samples were loaded onto a 15% TBE-urea polyacrylamide gel and run for 1 h at 180 V. Enzyme activity was determined by quantifying the amount of undigested tRNA after incubation. The E49A mutant was found to be  $\sim 15\%$  less active than codon optimized RNase U2.

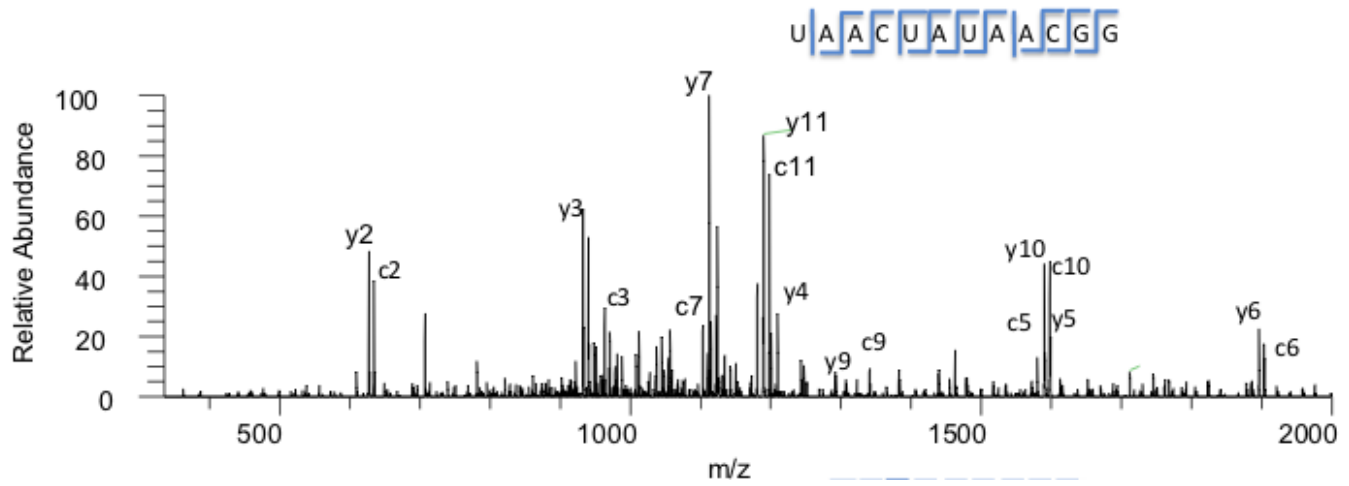

**Supplemental Figure S2.** CID mass spectrum with product ion assignments of the undigested synthetic oligonucleotide 5'-UAACUAUAACGG-3' upon incubation with the E49A mutant for 30 minutes.

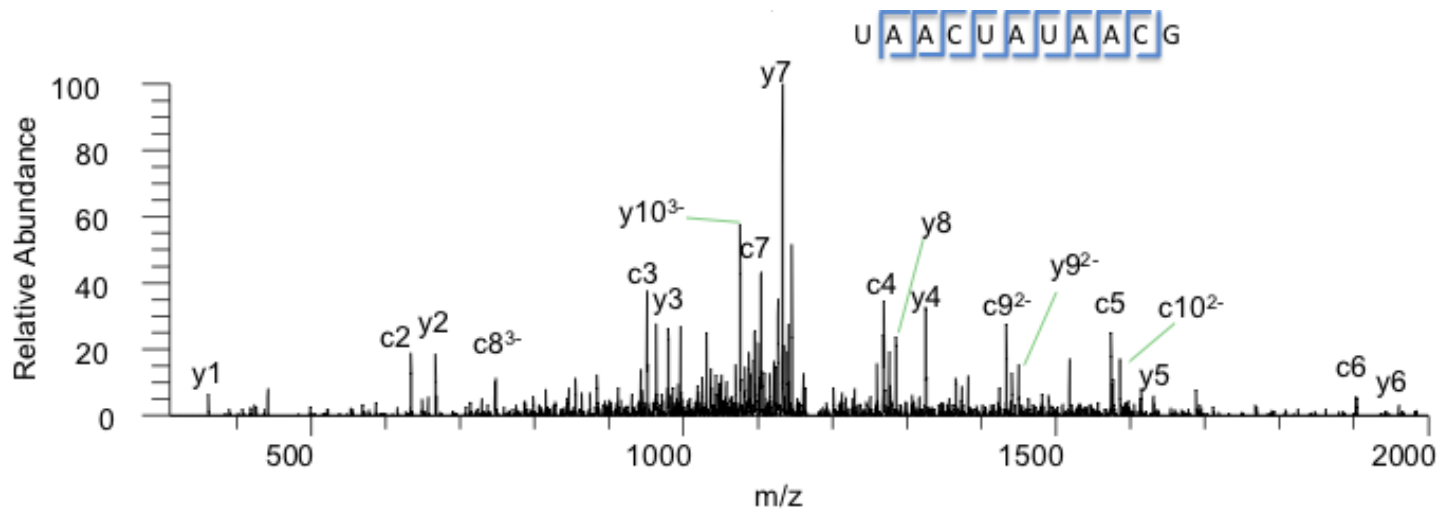

**Supplemental Figure S3.** CID mass spectrum with product ion assignments of the 5'-UAACUAUAACG-3' digestion product upon incubation with the E49A mutant for 30 minutes

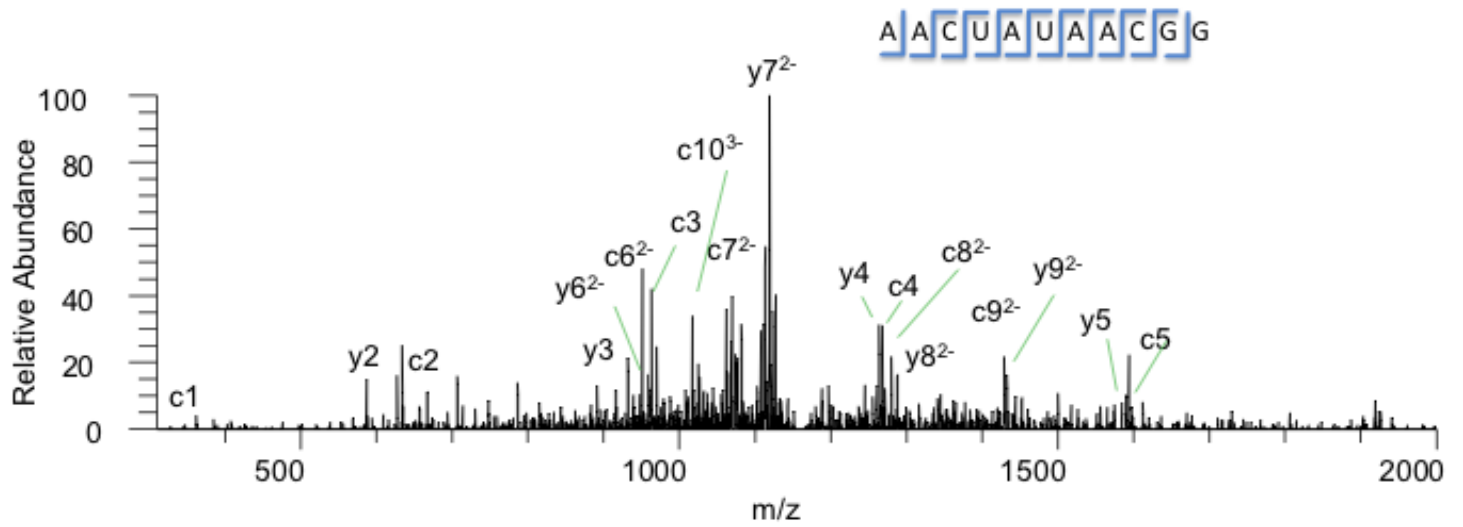

**Supplemental Figure S4.** CID mass spectrum with product ion assignments of the 5'-AACUAUAACGG-3' digestion product upon incubation with the E49A mutant for 30 minutes

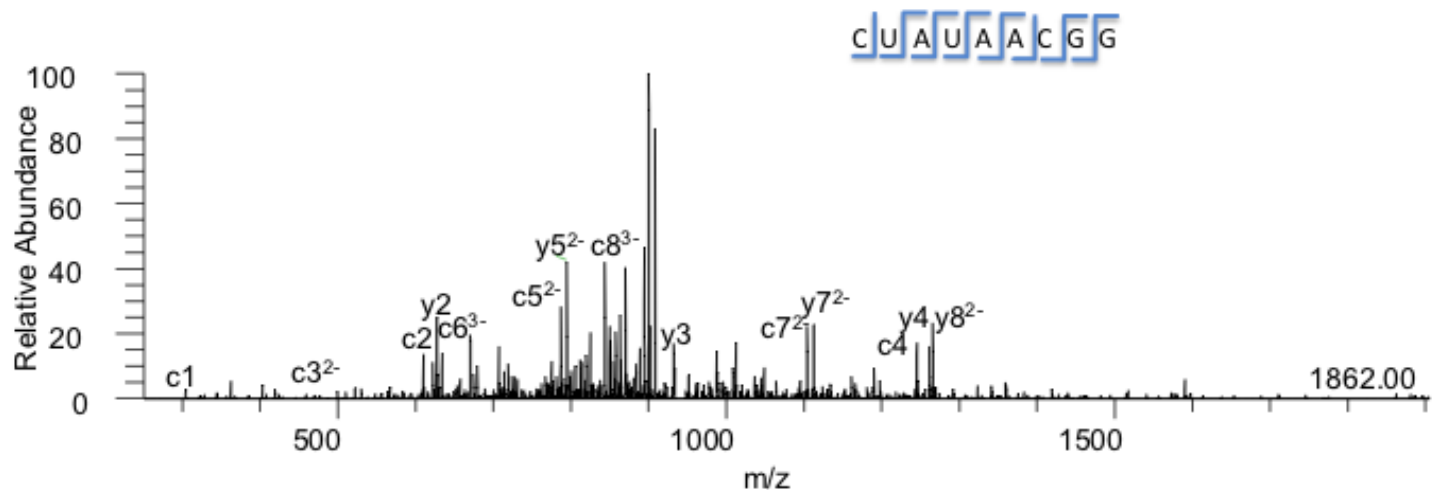

**Supplemental Figure S5.** CID mass spectrum with product ion assignments of the 5'-CUAUAACGG-3' digestion product upon incubation with the E49A mutant for 30 minutes

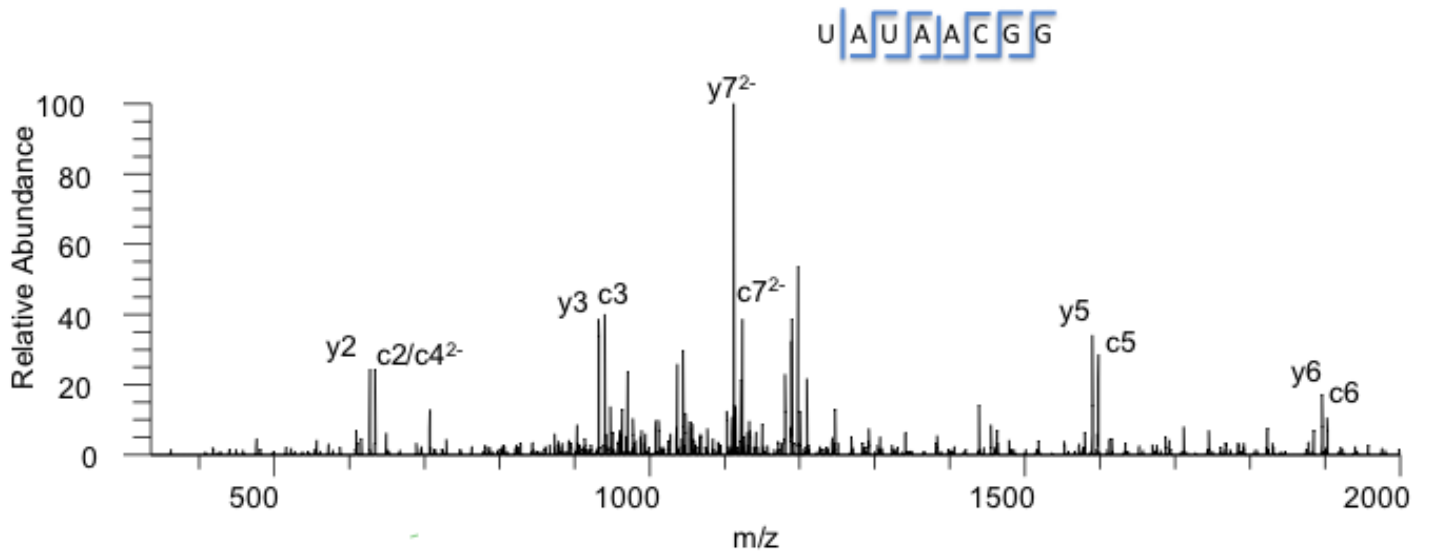

**Supplemental Figure S6.** CID mass spectrum with product ion assignments of the 5'-UAUAACGG-3' digestion product upon incubation with the E49A mutant for 30 minutes

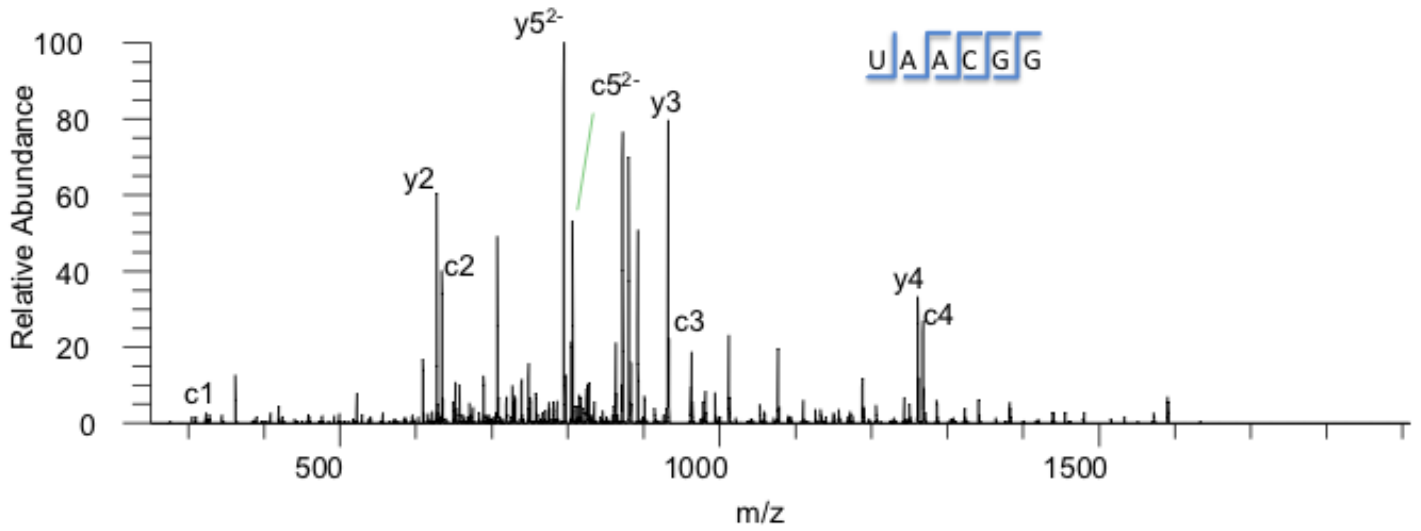

**Supplemental Figure S7.** CID mass spectrum with product ion assignments of the 5'-UAACG-3' digestion product upon incubation with the E49A mutant for 30 minutes



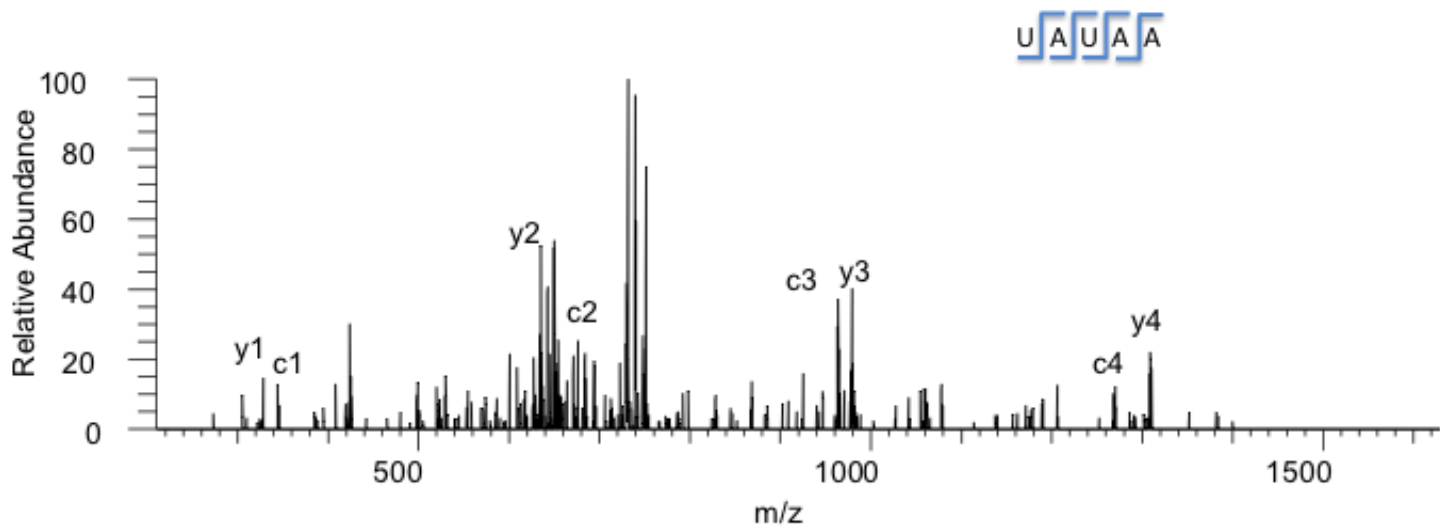

**Supplemental Figure S8.** CID mass spectrum with product ion assignments of the 5'-UAUAA-3' digestion product upon incubation with the E49A mutant for 30 minutes

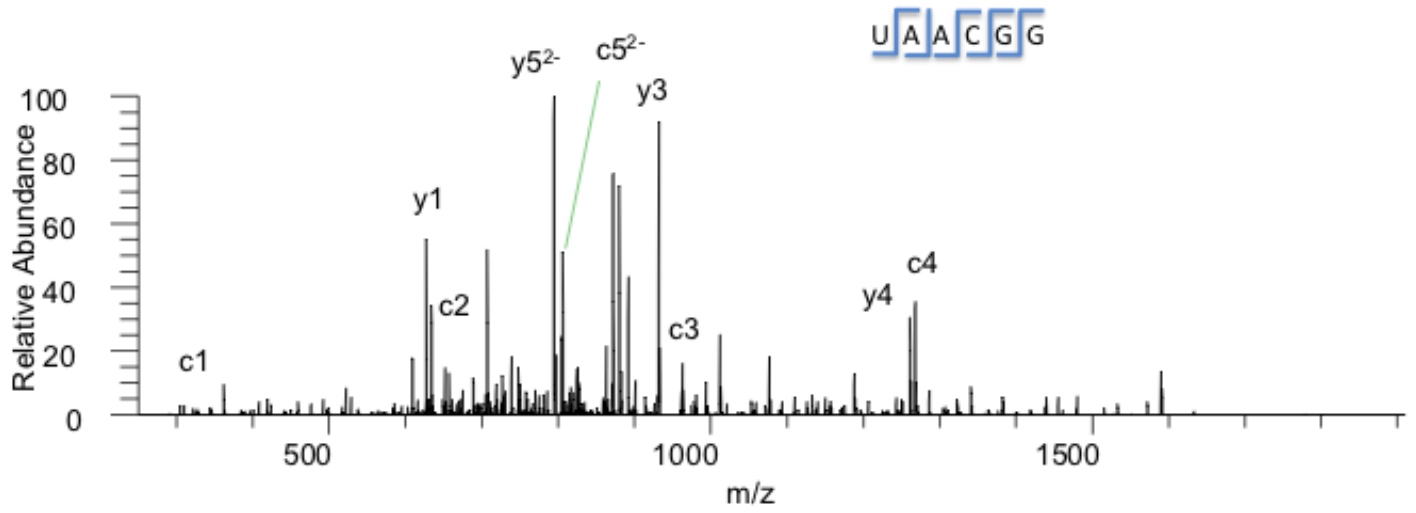

**Supplemental Figure S9.** CID mass spectrum with product ion assignments of the 5'-UAACGG-3' digestion product upon incubation with the E49A mutant for 30 minutes

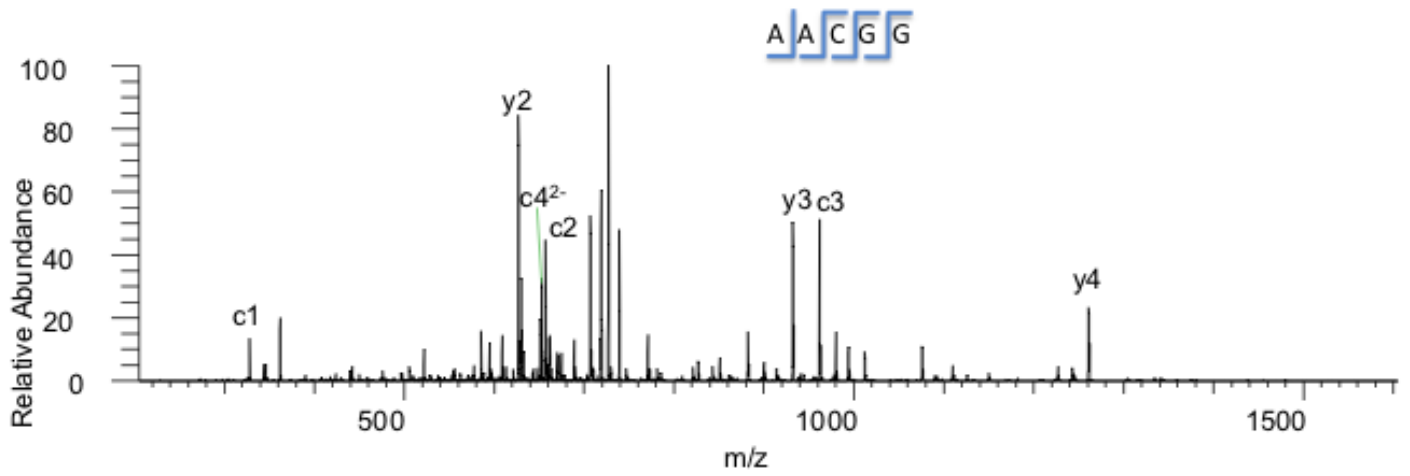

**Supplemental Figure S10.** CID mass spectrum with product ion assignments of the 5'-AACGG-3' digestion product upon incubation with the E49A mutant for 30 minutes

ACGG

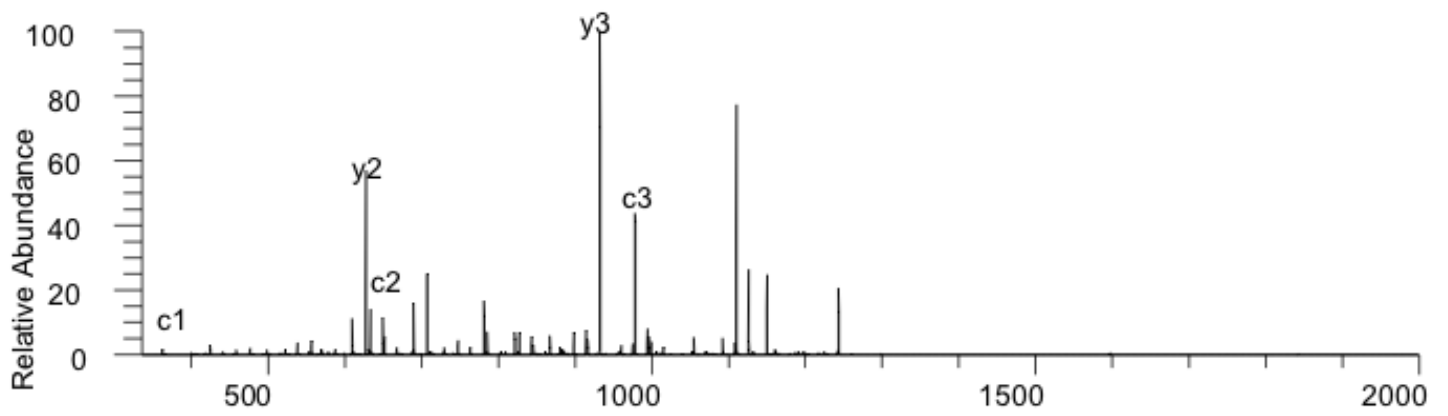

**Supplemental Figure S11.** CID mass spectrum with product ion assignments of the 5'-ACGG-3' digestion product upon incubation with the E49A mutant for 30 minutes

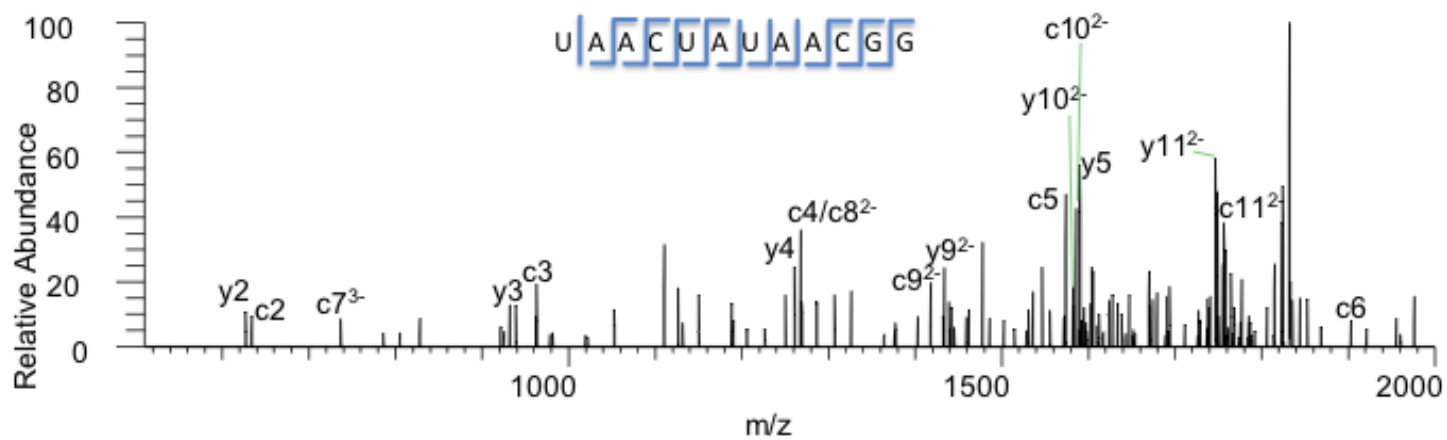

**Supplemental Figure S12.** CID mass spectrum with product ion assignments of the undigested synthetic oligonucleotide 5'-UAACUAUAACGG-3' upon incubation with codon-optimized RNase U2 for 30 minutes

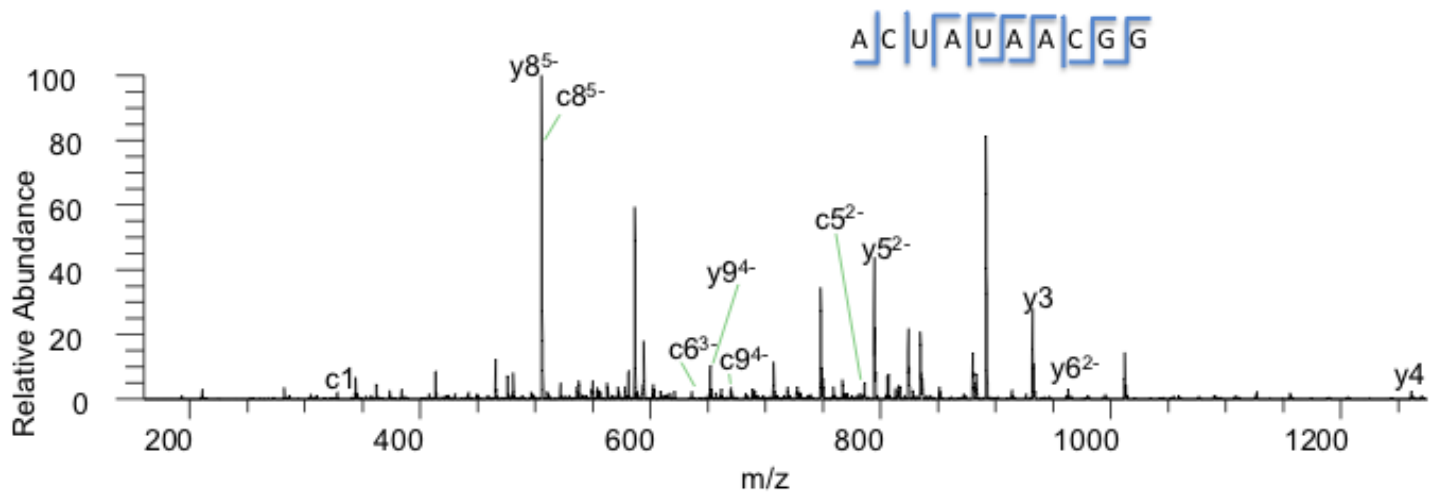

**Supplemental Figure S13.** CID mass spectrum with product ion assignments of the 5'-ACUAUAACGG-3' digestion product upon incubation with codon-optimized RNase U2 for 30 minutes

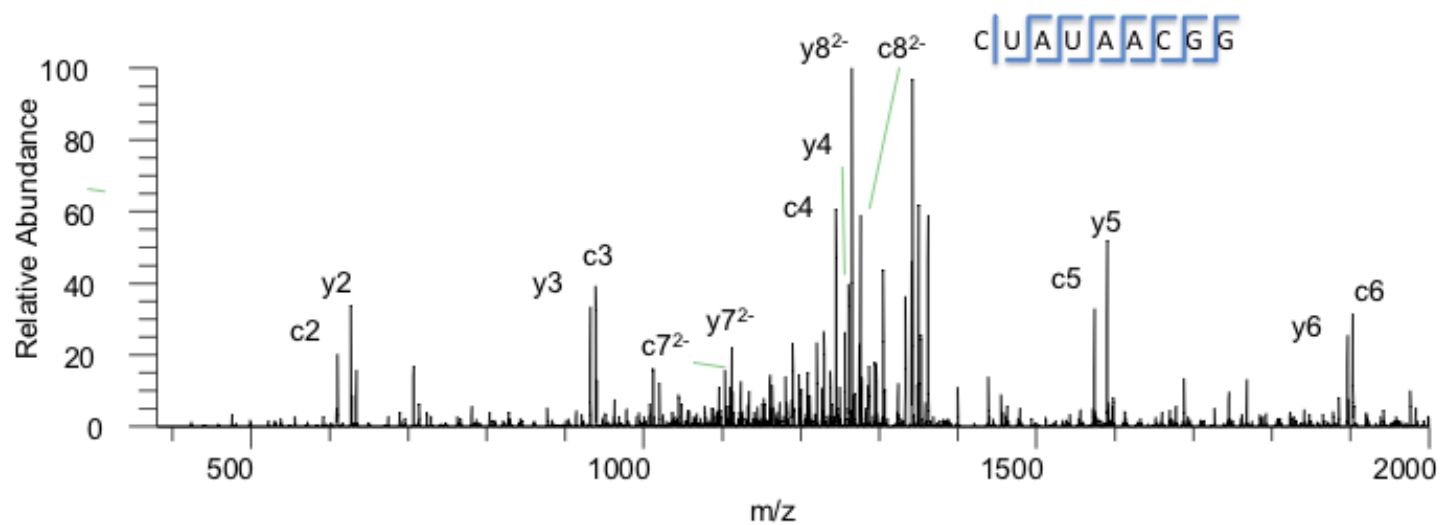

**Supplemental Figure S14.** CID mass spectrum with product ion assignments of the 5'-CUAUAACGG-3' digestion product upon incubation with codon-optimized RNase U2 for 30 minutes

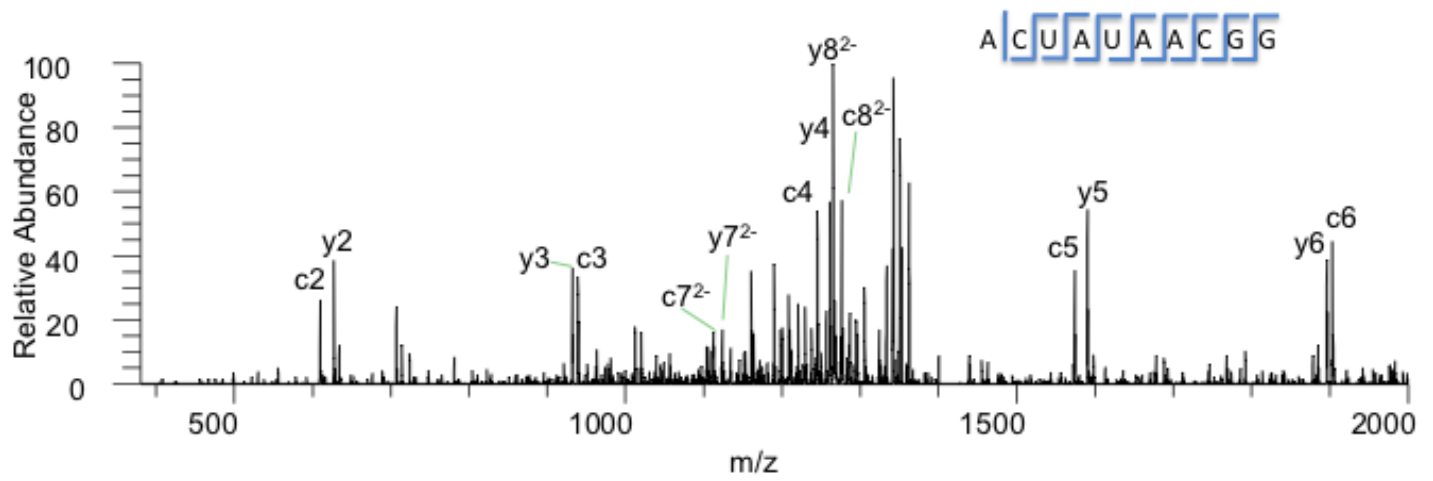

**Supplemental Figure S15.** CID mass spectrum with product ion assignments of the 5'-ACUAUAACGG-3' digestion product upon incubation with codon-optimized RNase U2 for 30 minutes



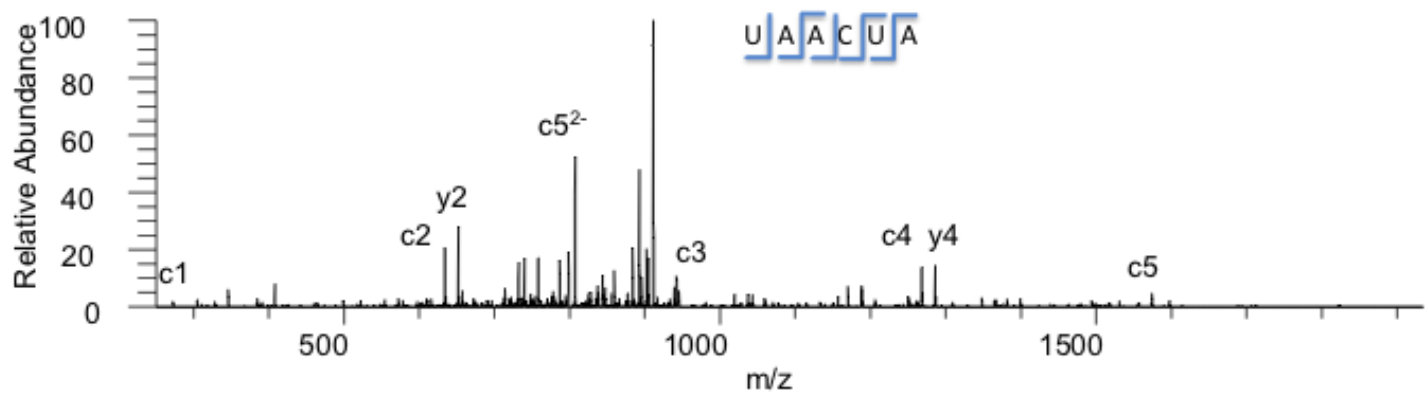

**Supplemental Figure S16.** CID mass spectrum with product ion assignments of the 5'-UAACUA-3' digestion product upon incubation with codon-optimized RNase U2 for 30 minutes

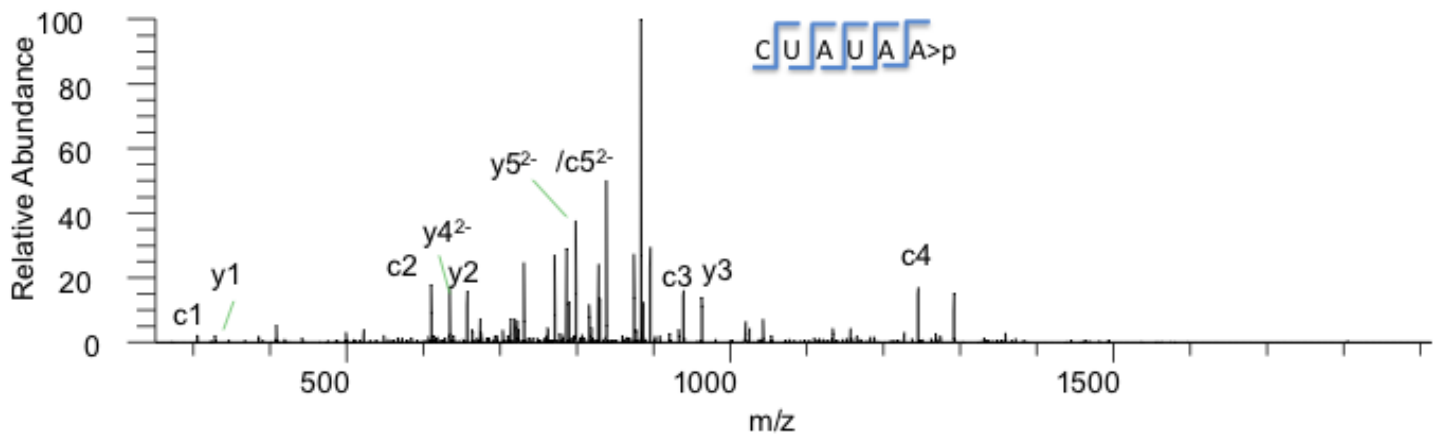

**Supplemental Figure S17.** CID mass spectrum with product ion assignments of the 5'-CUAUAA>p3' digestion product upon incubation with codon-optimized RNase U2 for 30 minutes

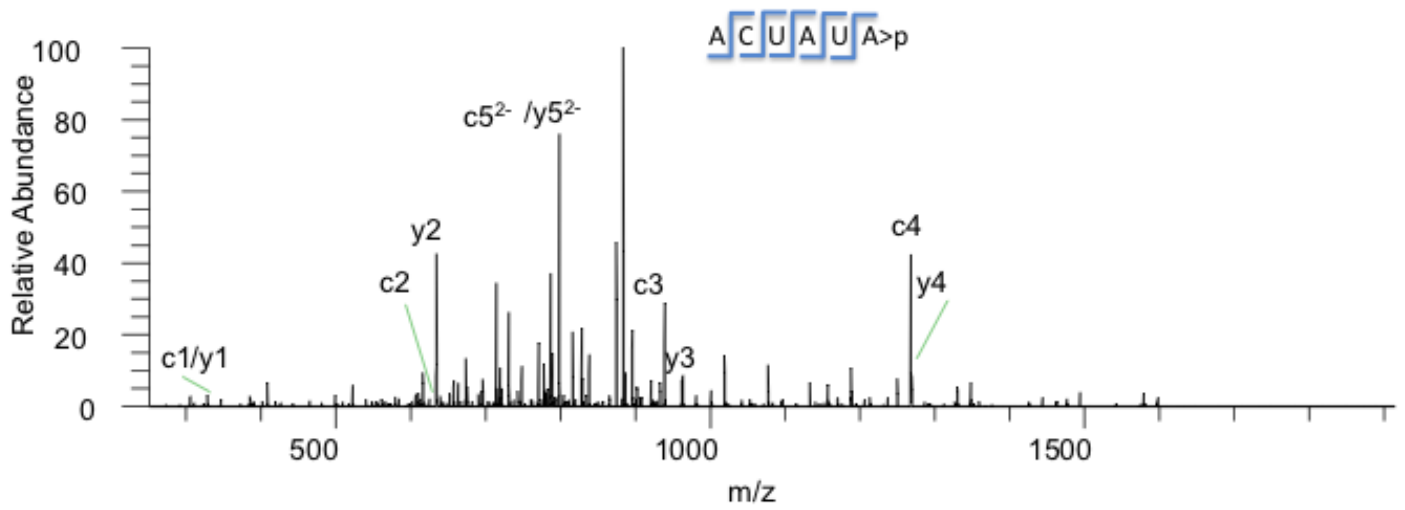

**Supplemental Figure S18.** CID mass spectrum with product ion assignments of the 5'-ACUAUA>p-3' digestion product upon incubation with codon-optimized RNase U2 for 30 minutes

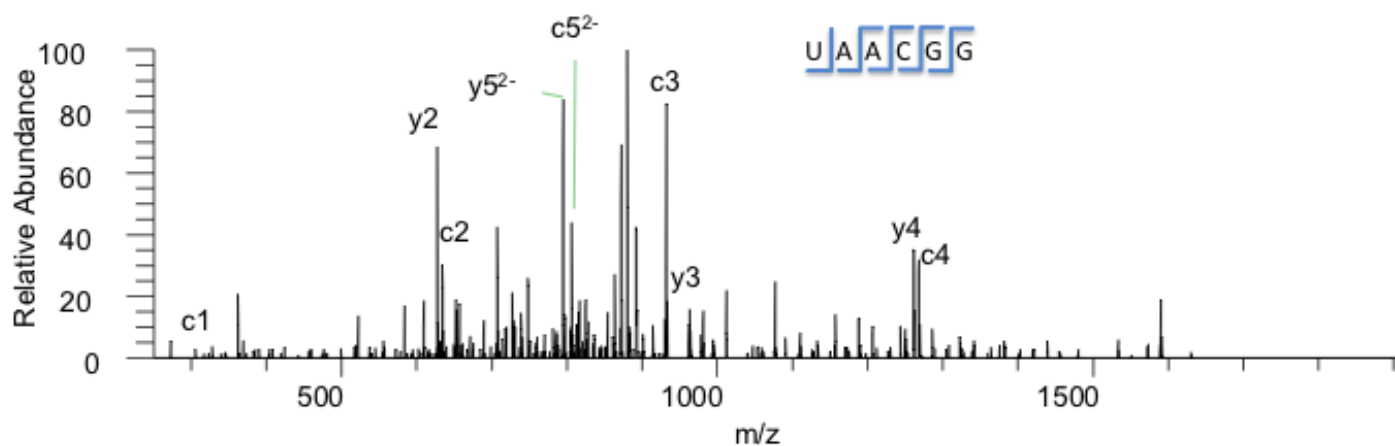

**Supplemental Figure S19.** CID mass spectrum with product ion assignments of the 5'-UAACGG-3' digestion product upon incubation with codon-optimized RNase U2 for 30 minutes

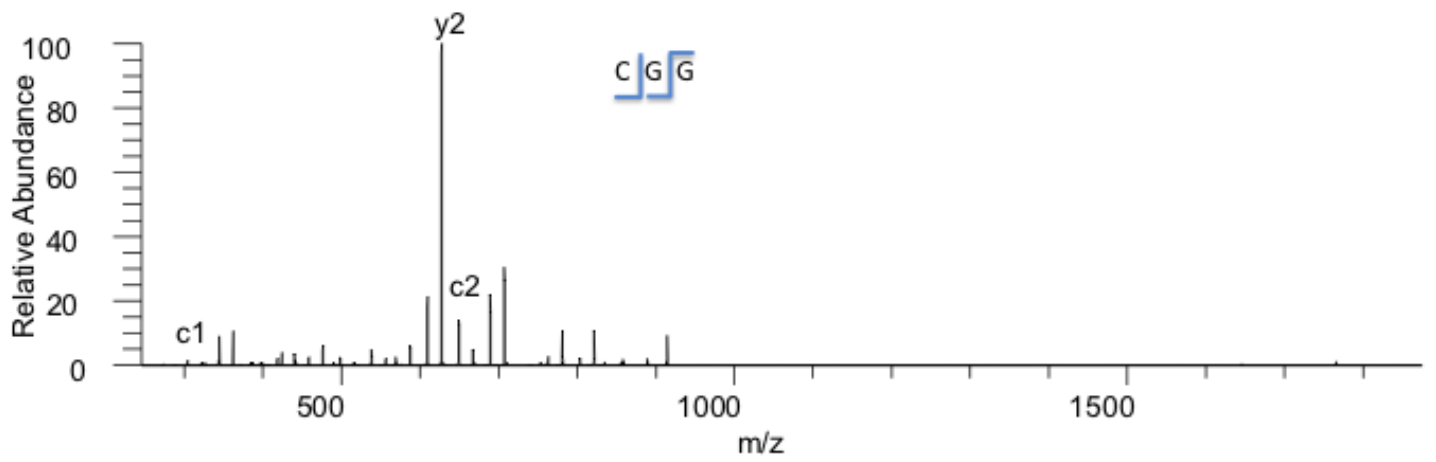

**Supplemental Figure S20.** CID mass spectrum with product ion assignments of the 5'-CGG-3' digestion product upon incubation with codon-optimized RNase U2 for 30 minutes

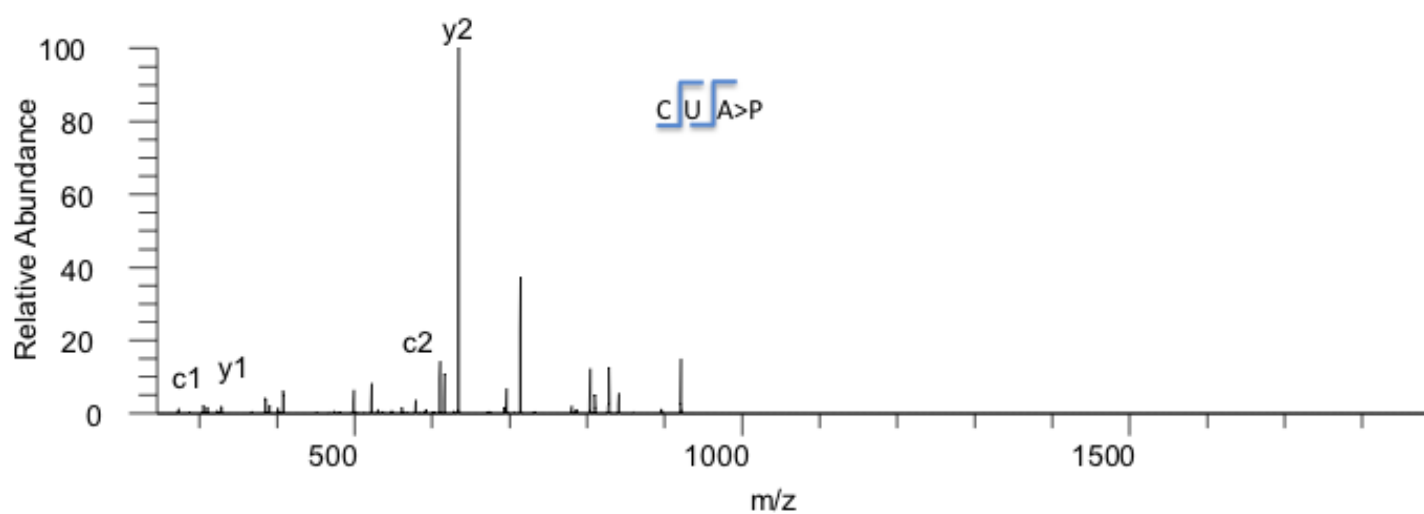

**Supplemental Figure S21.** CID mass spectrum with product ion assignments of the 5'-CUA>p-3' digestion product upon incubation with codon-optimized RNase U2 for 30 minutes

A 5'-GCGGAUUUA[m<sup>2</sup>G]CUCAGDDGGGAGAGC[m<sup>2</sup><sub>2</sub>G]CCAGA[Cm]U  
[Gm]AA[yW]A[Ψ][m<sup>5</sup>C]UGGAG[m<sup>7</sup>G]UC[m<sup>5</sup>C]UGUGT[Ψ]CG[m<sup>1</sup>A]UC  
CACAGAAUUCGCACCA-3'

B 5'-GCGGAUUUA[m<sup>2</sup>G]CUCAGDDGGGAGAGC[m<sup>2</sup><sub>2</sub>G]CCAGA[Cm]U  
[Gm]AA[yW]A[Ψ][m<sup>5</sup>C]UGGAG[m<sup>7</sup>G]UC[m<sup>5</sup>C]UGUGT[Ψ]CG[m<sup>1</sup>A]UC  
CACAGAAUUCGCACCA-3'

C 5'-GCGGAUUUA[m<sup>2</sup>G]CUCAGDDGGGAGAGC[m<sup>2</sup><sub>2</sub>G]CCAGA[Cm]U  
[Gm]AA[yW]A[Ψ][m<sup>5</sup>C]UGGAG[m<sup>7</sup>G]UC[m<sup>5</sup>C]UGUGT[Ψ]CG[m<sup>1</sup>A]UC  
CACAGAAUUCGCACCA-3'

D 5'-GCGGAUUUA[m<sup>2</sup>G]CUCAGDDGGGAGAGC[m<sup>2</sup><sub>2</sub>G]CCAGA[Cm]U  
[Gm]AA[yW]A[Ψ][m<sup>5</sup>C]UGGAG[m<sup>7</sup>G]UC[m<sup>5</sup>C]UGUGT[Ψ]CG[m<sup>1</sup>A]UC  
CACAGAAUUCGCACCA-3'

**Supplemental Figure S22.** Digestion products of *S. cerevisiae* tRNA-Phe with 5 ng E49A mutant incubated as described. **A.** Linear temperature gradient starting at 28 °C and ending at 65 °C in 7 minutes. **B.** Linear temperature gradient starting at 37 °C and ending at 65 °C over 5 minutes. **C.** Linear temperature gradient starting at 65 °C and ending at 45 °C over 30 minutes. **D.** Incubation at 65 °C, 45 °C and 37 °C at 5 minute intervals. Overall sequence coverage of tRNA from LC-MS/MS analysis is underlined.

**Supplemental Table S1.** Enzyme amounts and resulting tRNA sequence coverage for temperature ramp experiment. The enzyme used was the E49 mutant. Sequence coverage determined by LC-MS/MS. A linear temperature gradient starting at 28 °C and ending at 65 °C in 7 minutes provided sufficient incubation conditions for nearly complete sequence coverage of 5 µg of *S. cerevisiae* tRNA<sup>Phe</sup>, with optimal results obtained when 1 ng of enzyme was used.

| Amount of Enzyme (ng) | Sequence Coverage |
|-----------------------|-------------------|
| 0.1                   | 89%               |
| 0.2                   | 87%               |
| 0.5                   | 96%               |
| 1.0                   | 100%              |
| 1.5                   | 83%               |
| 2.0                   | 89%               |
